# Supplementary material for: Macrophage migration inhibitory factor downregulation: a novel mechanism of resistance to anti-angiogenic therapy
Source: PubMed Central journal article supplement — Oncogene. 2017 Feb 20;36(26):3749–59. doi: 10.1038/onc.2017.1 (PMC5491354; doi:10.1038/onc.2017.1), 2017-02-20
Supplement: NIHMS839085-supplement-5.pdf [file NIHMS839085-supplement-5.pdf]

## Central Core

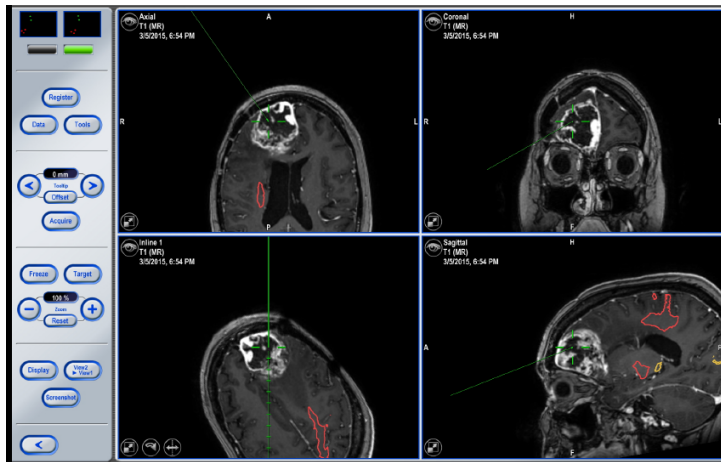

## Enhancing Edge

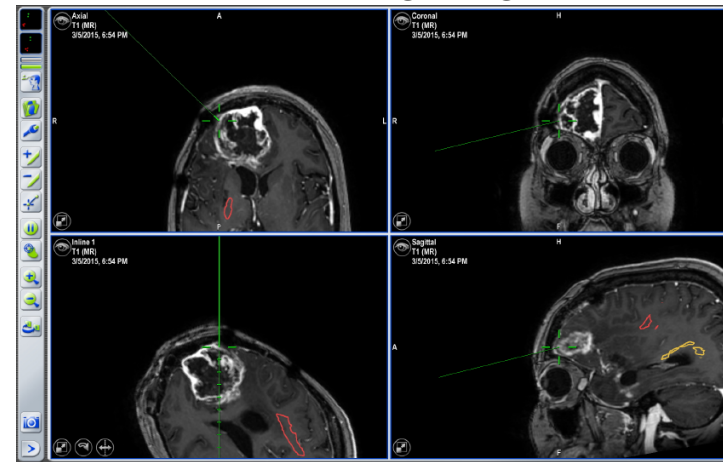

## Infiltrated white matter (outside enhancement, within FLAIR)

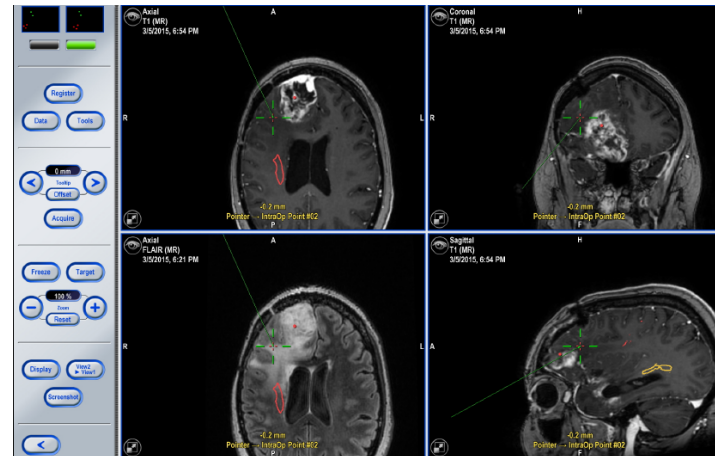

**Supplementary Figure S1: Screen shots from the neuro-navigation illustrating where site-directed biopsies were taken from.** Shown are screen shots taken from the neuro-navigation (BrainLAB system) illustrating locations of site-directed biopsies taken from the central core, enhancing edge, and infiltrated white matter of a representative bevacizumab-naïve recurrent glioblastoma.

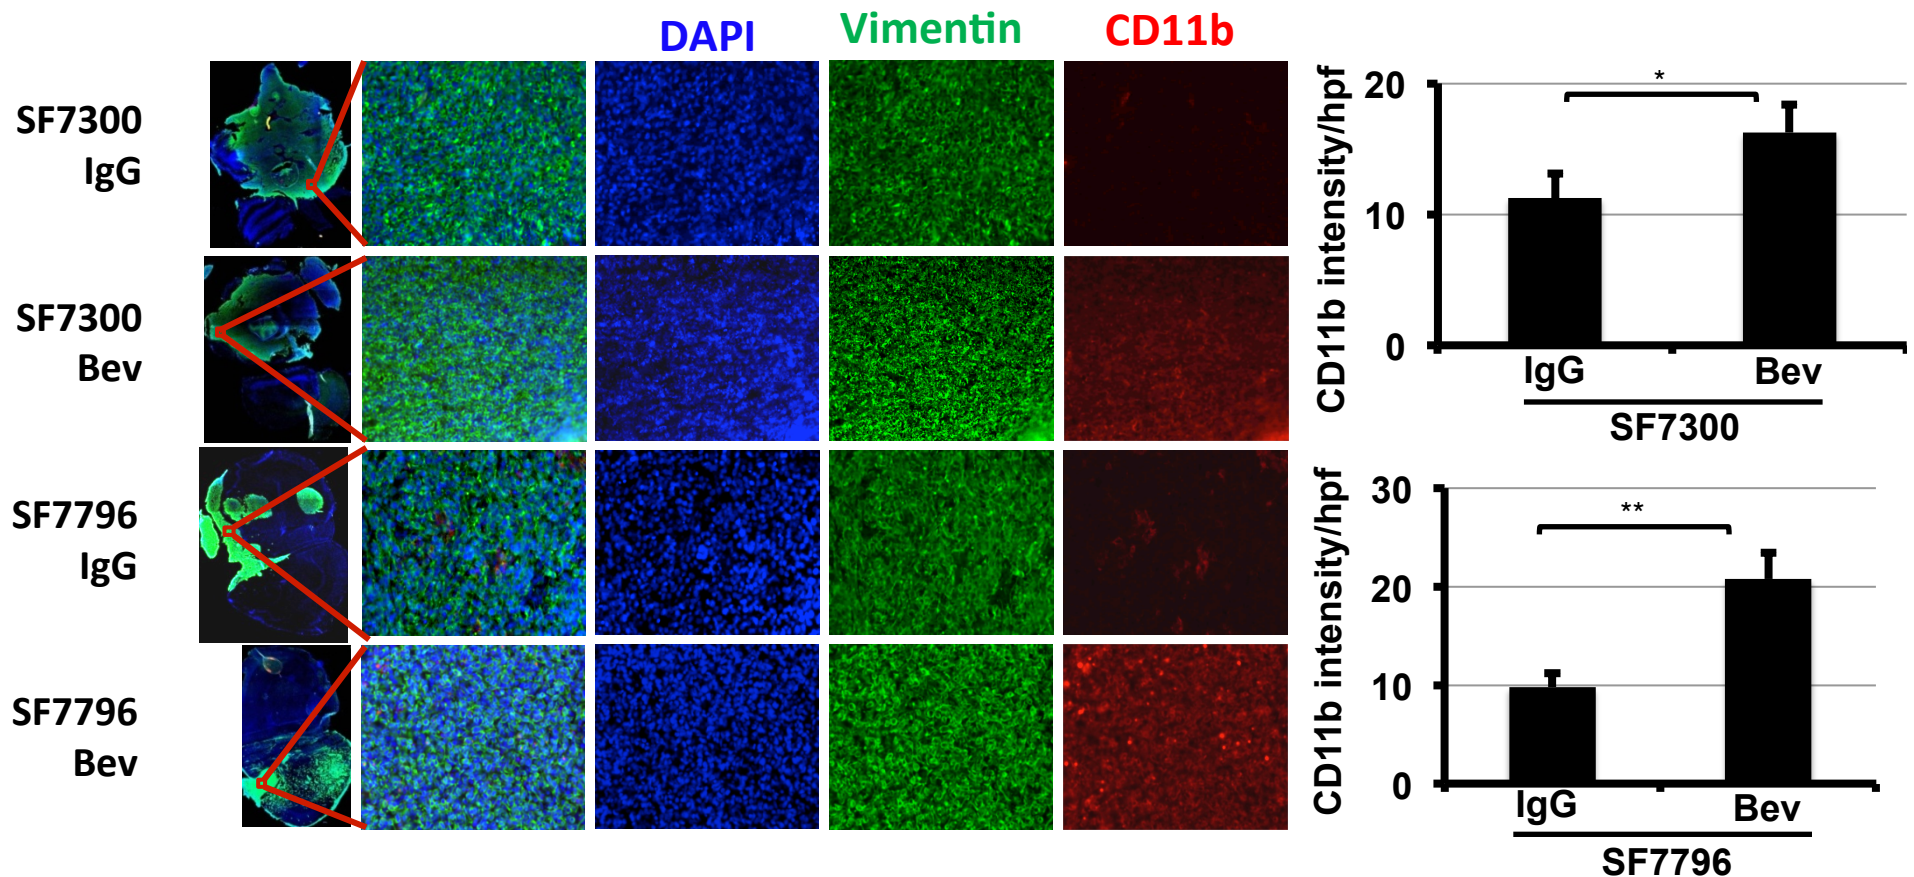

**Supplementary Figure S2: Assessing tumor-associated macrophages in patient-derived bevacizumab sensitive versus resistant xenografts.** Intracranial patient-derived xenografts which maintain the sensitivity (SF7300) or resistance (SF7796) of the patient glioblastoma they derived from were treated with IgG control antibody or bevacizumab (n=5/group). Resulting xenografts were stained for human vimentin (green) to visualize tumor cells, DAPI (blue) for nuclear staining, and CD11b (red) for macrophage staining. Image J analysis of red staining intensity revealed that bevacizumab increased TAMs significantly in both bevacizumab sensitive SF7300 (P=0.01) and bevacizumab-resistant SF7796 (P=0.002) xenografts (**Supplementary Fig. S1**), but the increase in macrophages was significantly larger in bevacizumab-resistant SF7796 than bevacizumab-sensitive SF7300 xenografts (111% vs. 44%,  $p=0.01$ ).

\*  $P < 0.05$ , \*\*  $P < 0.01$ , \*\*\*  $P < 0.001$

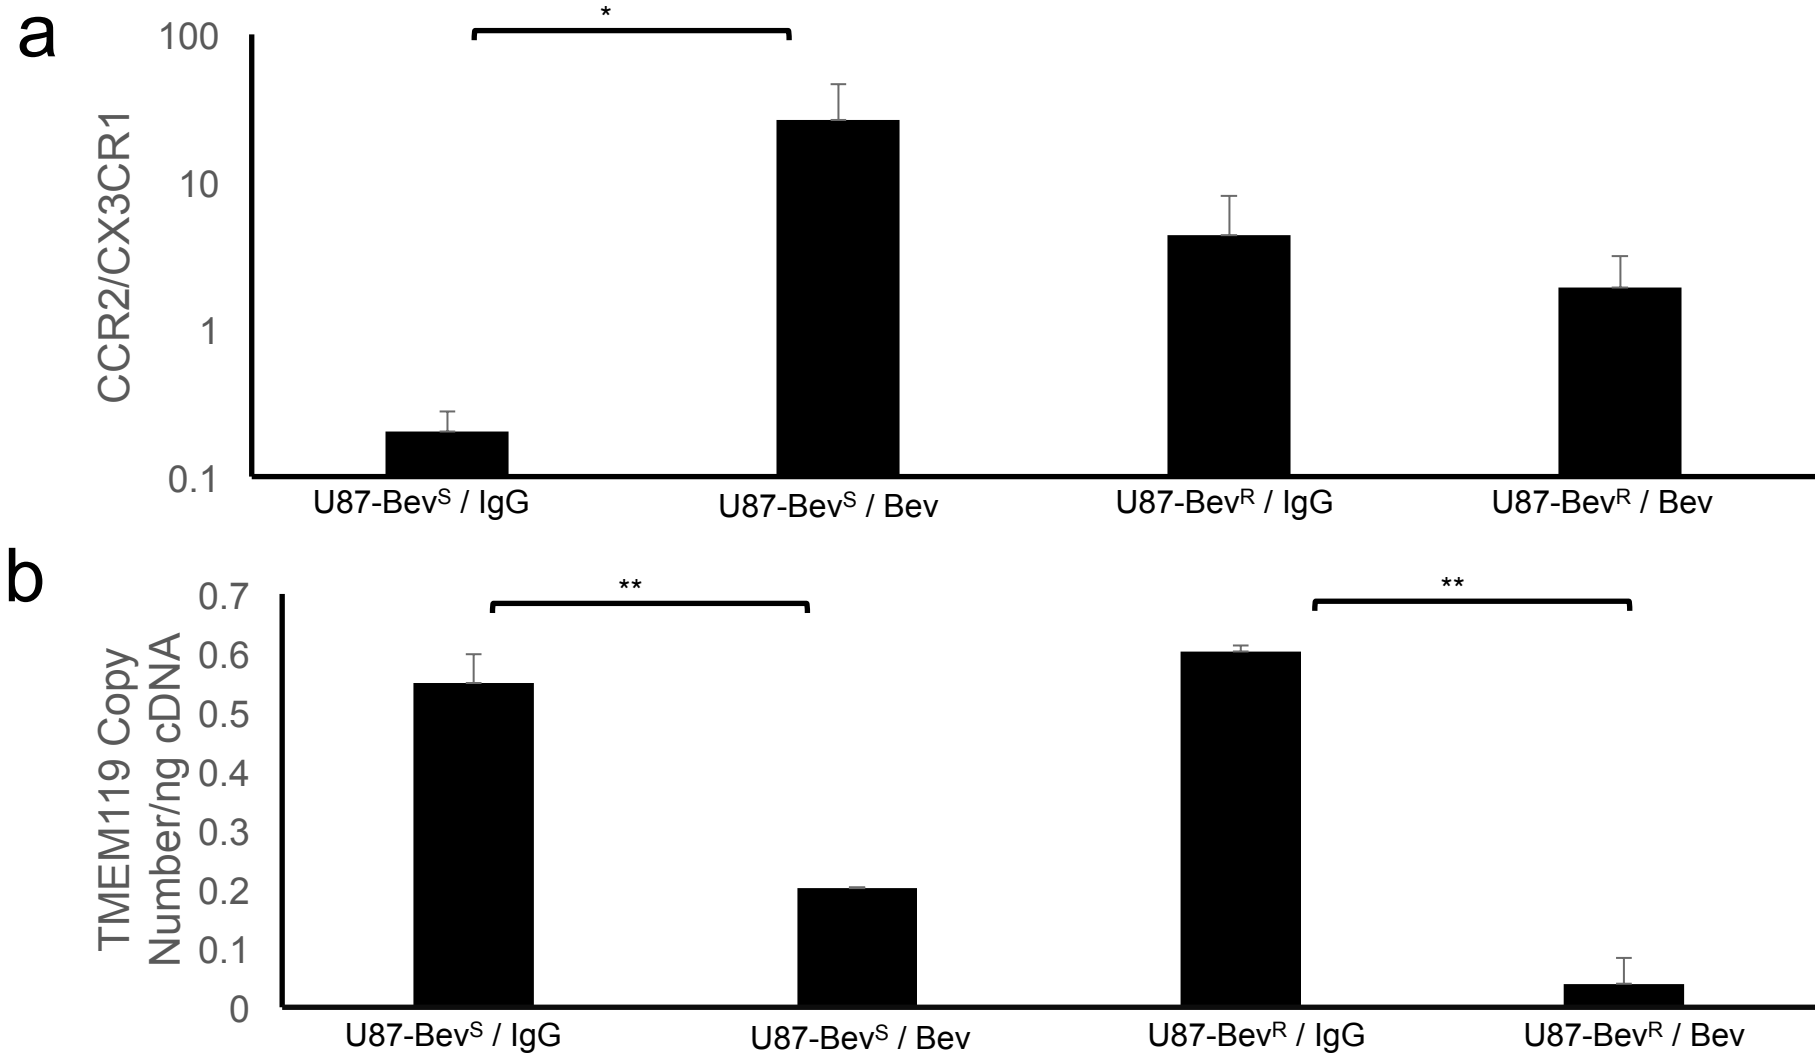

**Supplementary Figure S3: Analyzing CD11b<sup>+</sup> cells for expression of macrophage versus microglia markers in bevacizumab-responsive versus resistant xenografts.** CD11b<sup>+</sup> cells were isolated from intracranial U87-Bev<sup>S</sup> and U87-Bev<sup>R</sup> xenografts treated with IgG control antibody versus bevacizumab. qPCR was then used to analyze expression of (a) macrophage marker CCR2 and microglia marker CX3CR1, expressed as a ratio, which increased with bevacizumab treatment of U87-Bev<sup>S</sup> (P=0.01) but not U87-Bev<sup>R</sup> (P=0.6) xenografts; and (b) microglia marker TMEM119, expressed as copy number per ng of cDNA, which decreased with bevacizumab treatment of U87-Bev<sup>S</sup> (P=0.001) and U87-Bev<sup>R</sup> (P=0.002) xenografts. Error bars represent standard deviation (n=3/group).

\* P<0.05, \*\* P<0.01, \*\*\* P<0.001

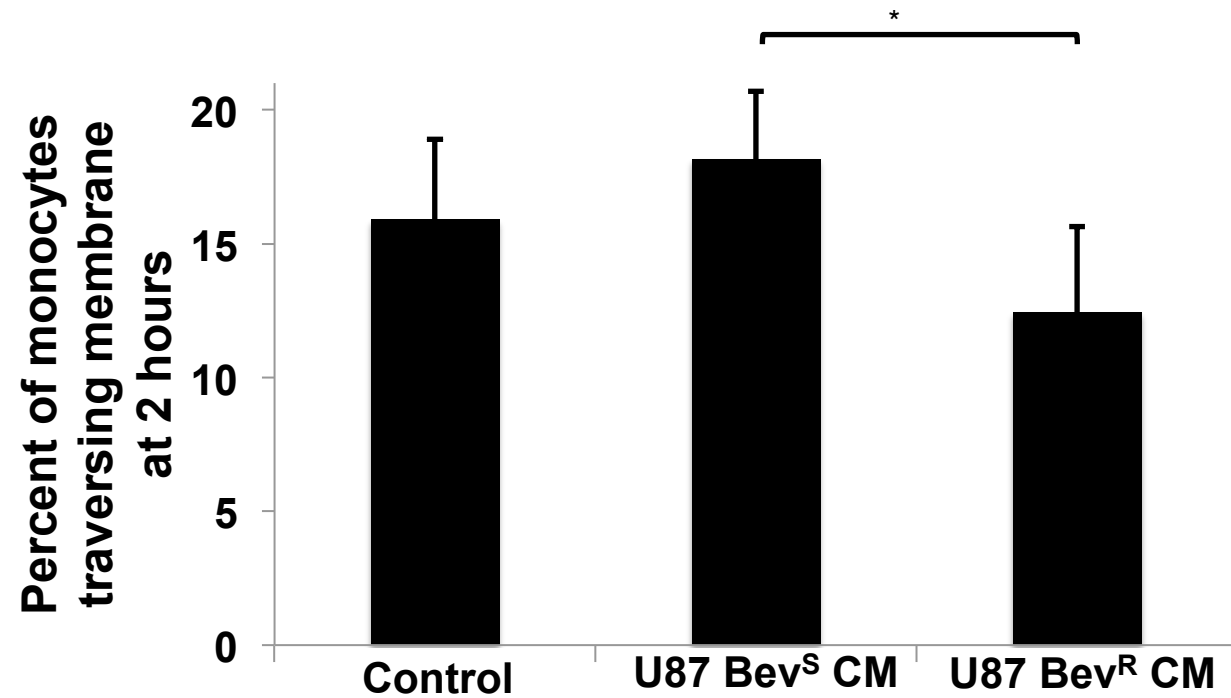

**Supplementary Figure S4: Pre-treatment with U87-Bev<sup>R</sup> conditioned media decreases chemotactic responsiveness.** To assess the impact of tumor-conditioned media and macrophage migratory inhibitory factor (MIF) on monocyte chemotactic responsiveness, THP-1 monocytes were incubated for 20 hours in U87-Bev<sup>R</sup> conditioned or U87-Bev<sup>S</sup> conditioned media. The chemotactic response of THP-1 human monocytes to monocyte chemotactic protein-1 (MCP-1/CCL2) was reduced after pre-treatment with U87-Bev<sup>R</sup> conditioned media compared to U87-Bev<sup>S</sup> conditioned media ( $P = 0.03$ ) ( $n=4/\text{group}$ ).

\*  $P < 0.05$ , \*\*  $P < 0.01$ , \*\*\*  $P < 0.001$



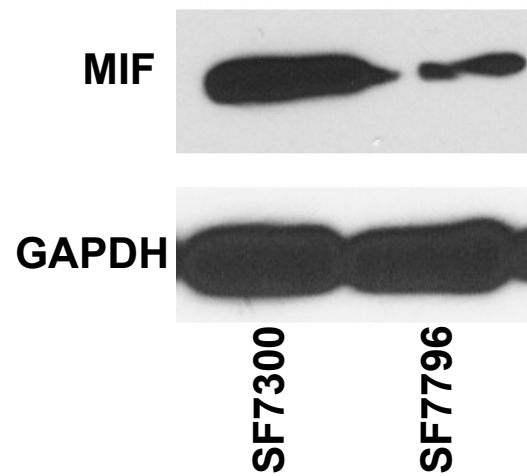

**Supplementary Figure S5: Comparing MIF expression of bevacizumab-sensitive versus resistant patient-derived xenograft.** Western blot revealed less MIF expression in lysates of intracranial xenografts derived from SF7796 (resistant) versus SF7300 (sensitive) patient-derived xenografts.

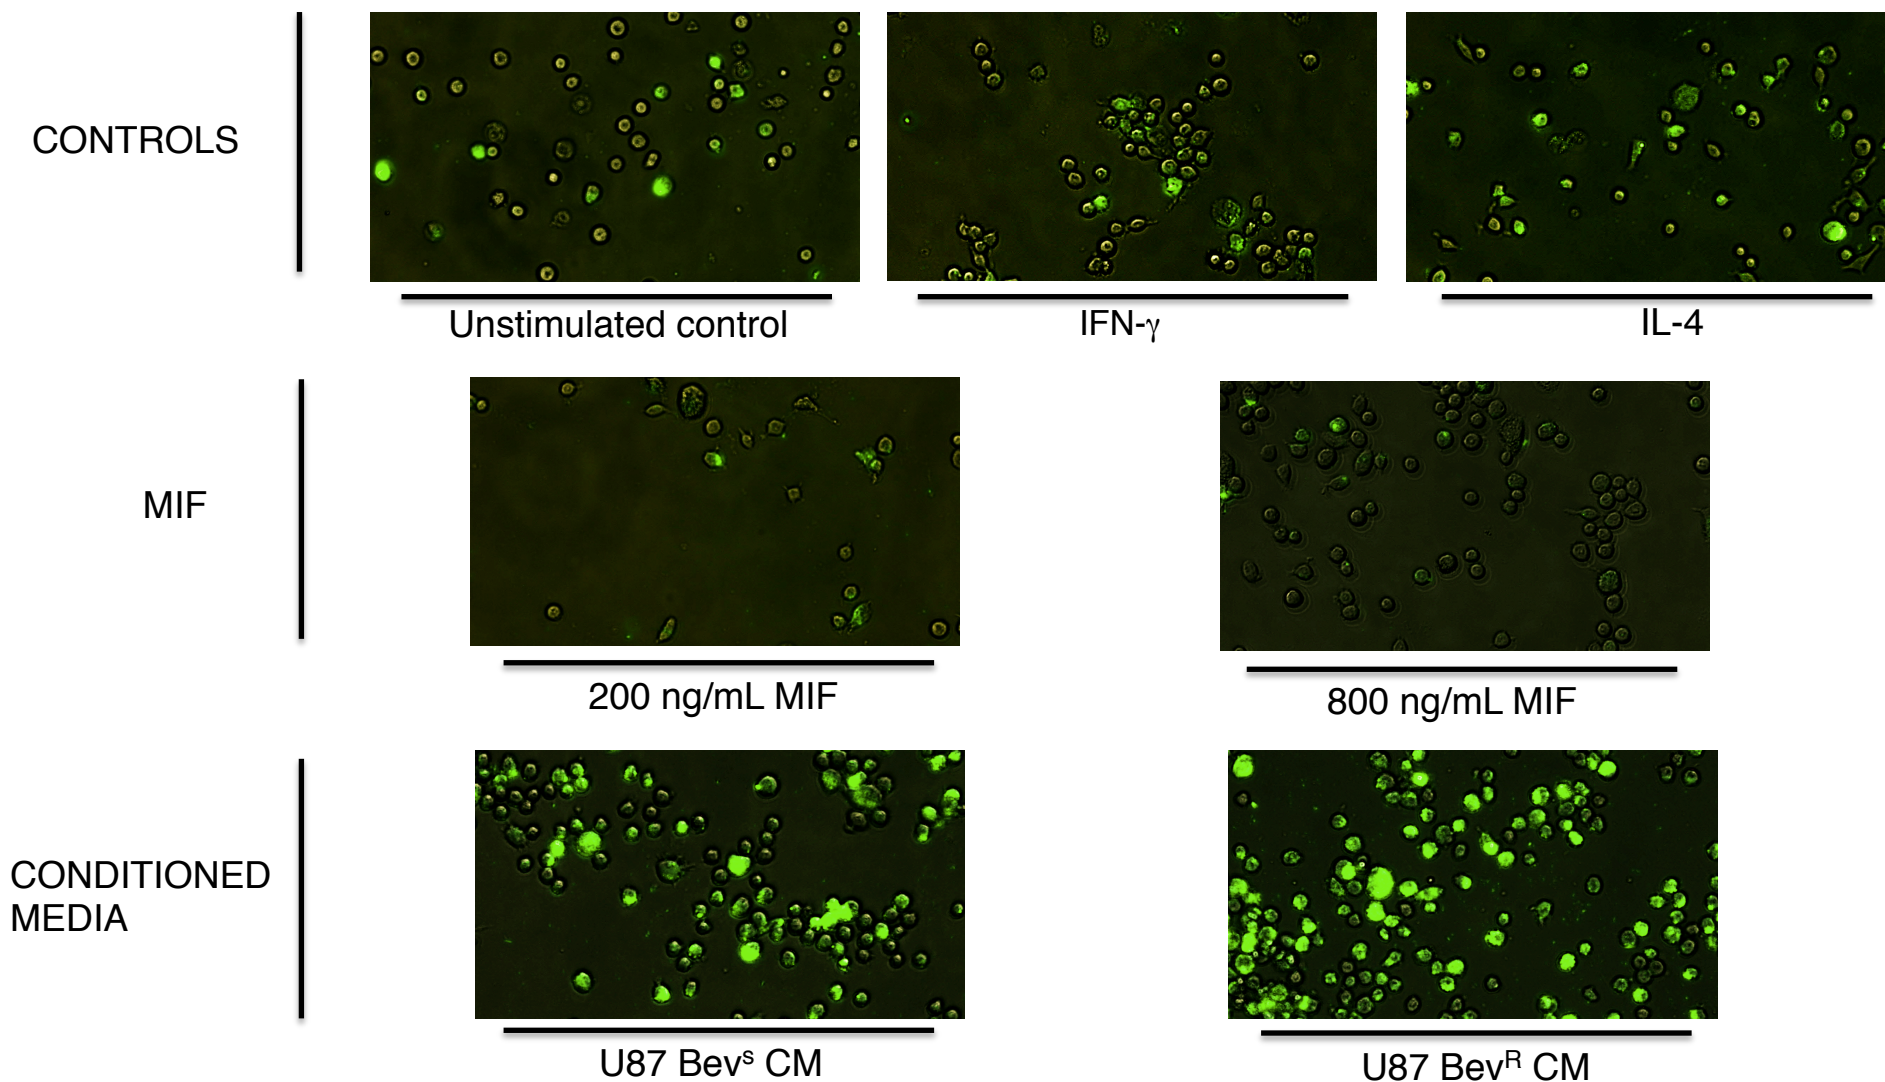

**Supplementary Figure S6: Representative photos from phagocytosis assays.** These representative photos are taken from all of the experimental groups in the phagocytosis assays depicted in **Fig. 2b**. In this assay, phagocytic activity of unstimulated macrophages derived from THP-1 monocytes and THP-1-derived macrophages treated with recombinant MIF, IFN- $\gamma$  (M1 positive control), IL-4 (M2 positive control), or conditioned media (CM) was assessed via uptake of fluorescent heat-killed *E. coli* with subsequent measurement of the proportion of fluorescent cells. As shown in **Fig. 2b**, M1 polarized macrophages were less phagocytic whereas M2 polarized macrophages were more phagocytic relative to the unstimulated control. THP-1-derived macrophages treated with 800 ng/mL MIF were less phagocytic relative to control ( $P=0.005$ ). Macrophages treated with CM from U87-Bev<sup>R</sup> cells were more phagocytic than macrophages treated with U87-Bev<sup>S</sup> CM ( $P<0.05$ ) ( $n=6$ /group).

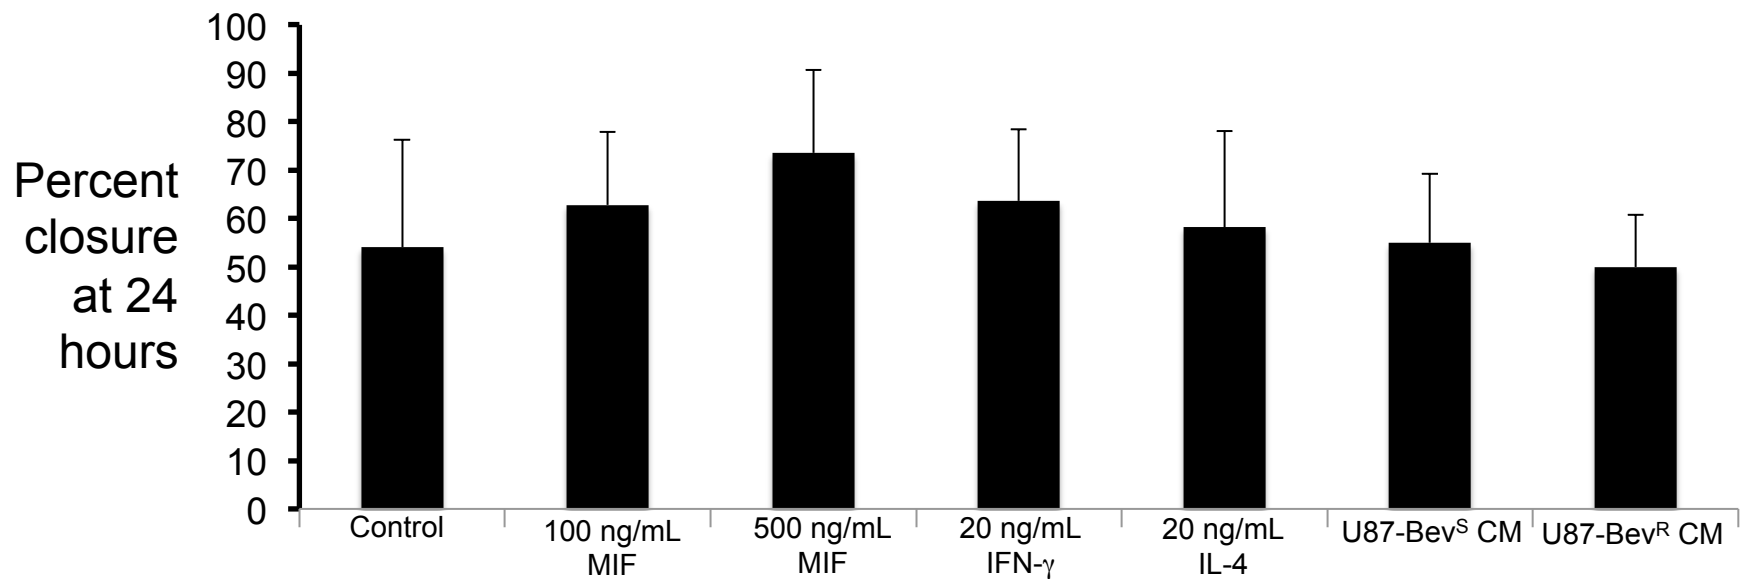

**Supplementary Figure S7: Motility of tumor cells induced by sequential conditioned media from macrophages.**

Sequential conditioned media experiments were performed as illustrated in **Figure 3c**. Briefly, media from U87-Bev<sup>R</sup> or U87-Bev<sup>S</sup> cells or chemokines of varying concentration for controls were applied to THP-1-derived macrophages, and the media was then taken from those macrophages and applied to U87-MG cells. The motility of the U87-MG cells was then assessed using scratch assays. There was no significant difference in the motility of U87 cells grown in conditioned media from macrophages that were grown in 0 vs. 500 ng/mL MIF ( $P=0.3$ ), 20 ng/mL IFN- $\gamma$  (M1 positive control) vs. 20 ng/mL IL-4 (M2 positive control) ( $P=0.7$ ), or conditioned media from U87-Bev<sup>S</sup> vs. U87-Bev<sup>R</sup> cells ( $P=0.6$ ).

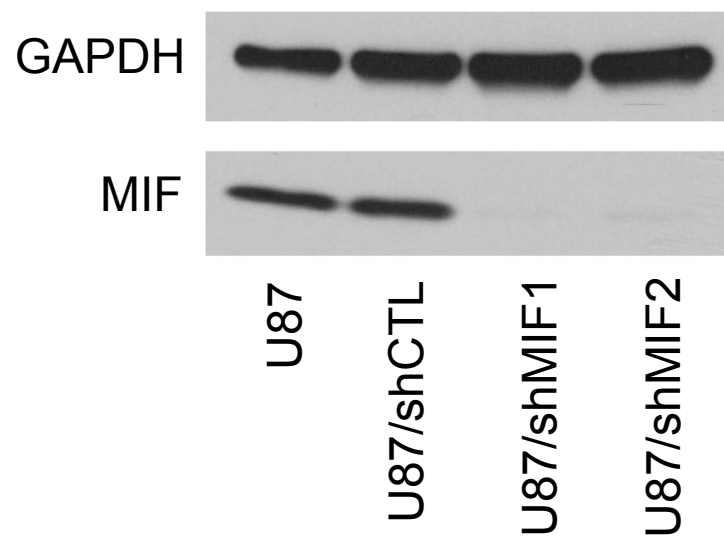

**Supplementary Figure S8: Confirmation of MIF knockdown.** Knockdown of MIF in U87 glioma cells transduced using a lentiviral MIF shRNA vector was confirmed via Western blot. Compared to normal U87 cells and U87 cells transduced with a non-specific shRNA construct (U87/shCTL), the average percent knockdown of MIF in U87 cells (assayed by band densitometry performed using ImageJ software) transduced with two different sequences of MIF-targeted shRNA (U87/shMIF1 and U87/shMIF2) when normalized to GAPDH was 91.1% and 98.9%, respectively.

U87/shCTL

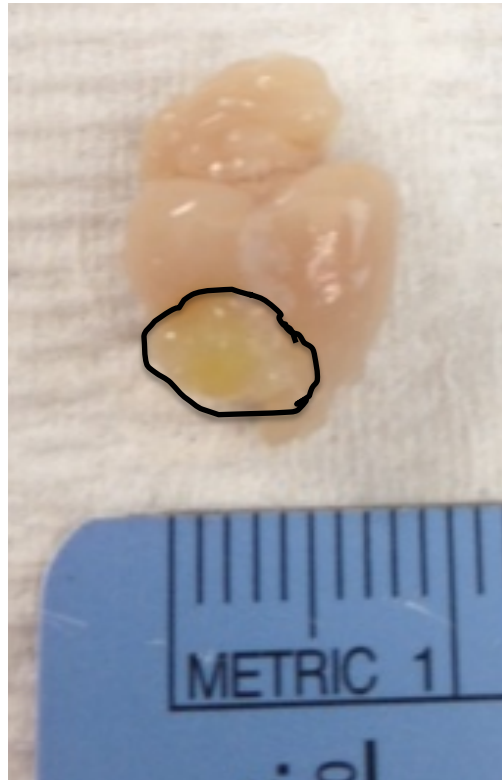

U87/shMIF1

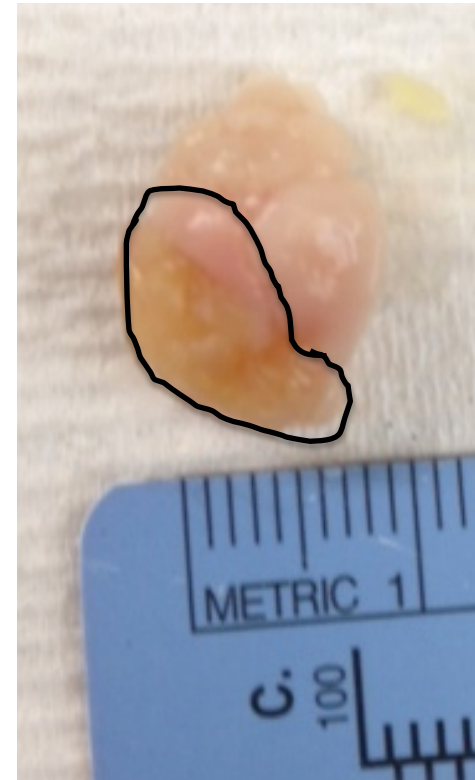

**Supplementary Figure S9: Differential size and vascularity of MIF knockdown xenografts relative to control xenografts appreciated on gross visualization after brain explantation.** Four weeks after implantation, explanted brains revealed that U87/shMIF tumors were grossly larger and more pink or yellow (suggesting greater vascularity) than U87/shCTL tumors, which were smaller and more pale.

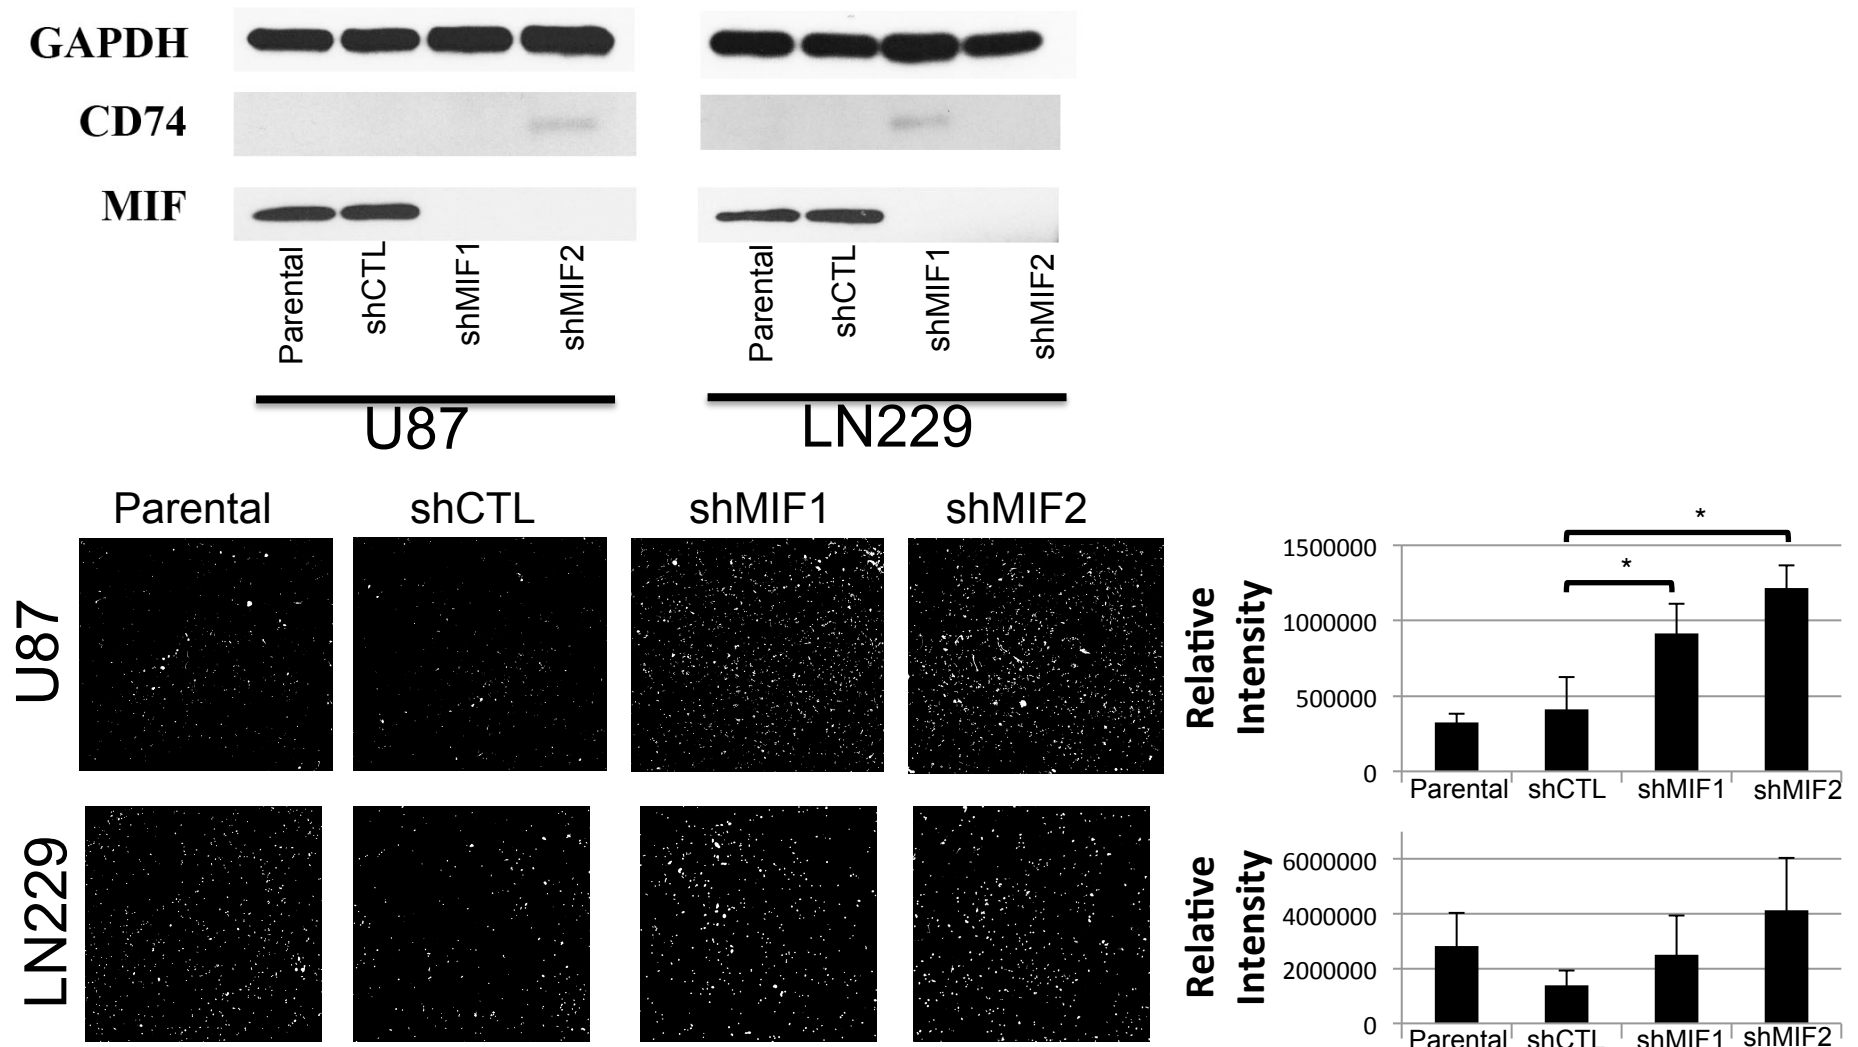

**Supplementary Figure S10: Transduction with MIF shRNA increases or does not affect invasiveness in U87 and LN229 glioblastoma cells.** Knockdown of MIF in U87 and LN229 glioma cells transduced using a lentiviral vector harboring two different MIF-targeted shRNAs (shMIF1 and shMIF2) relative to parental cells and cells transduced using a lentiviral vector harboring shRNA targeting control sequence (shCTL) were confirmed via Western blot. Matrigel chamber invasion assays revealed that, compared to parental cells and shCTL-transduced cells, U87/shMIF1 and U87/shMIF2 were more invasive ( $P=0.02$  and  $0.01$ , respectively), while LN229/shMIF1 and LN229/shMIF2 exhibited no change in invasiveness ( $P=0.8$  and  $0.4$ , respectively). The western blot also did not reveal much expression of MIF receptor CD74 in U87 and LN229.

\*  $P<0.05$ , \*\*  $P<0.01$ , \*\*\*  $P<0.001$



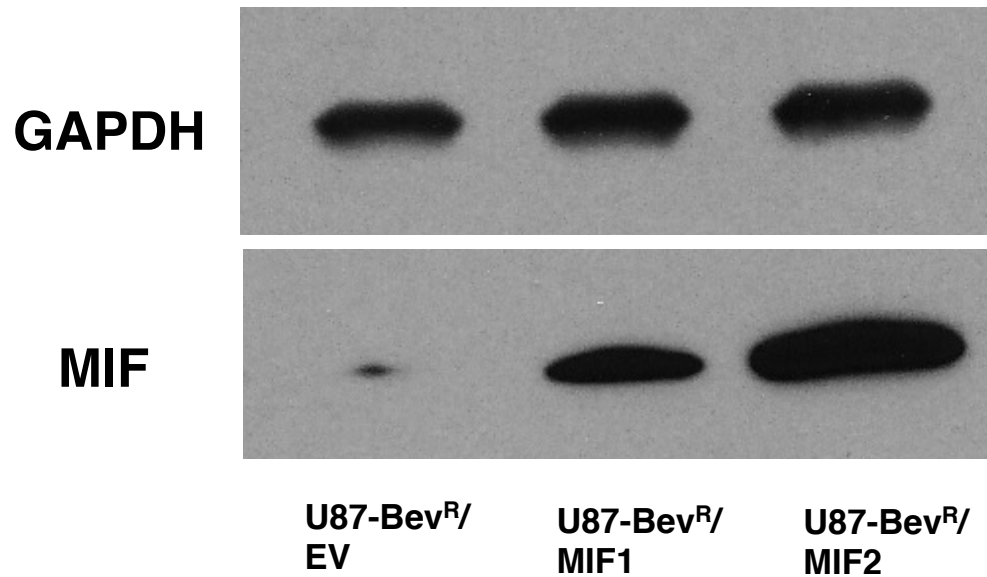

**Supplementary Figure S11: Confirmation of MIF overexpression in transduced clones.** Compared to U87-Bev<sup>R</sup> cells transduced with empty vector (U87-Bev<sup>R</sup>/EV), U87-Bev<sup>R</sup> cells transduced with virus containing drug resistance gene and the human MIF cDNA followed by clonal selection to isolate two drug-resistant clones (U87-Bev<sup>R</sup>/MIF1 and U87-Bev<sup>R</sup>/MIF2) exhibited increased MIF expression.

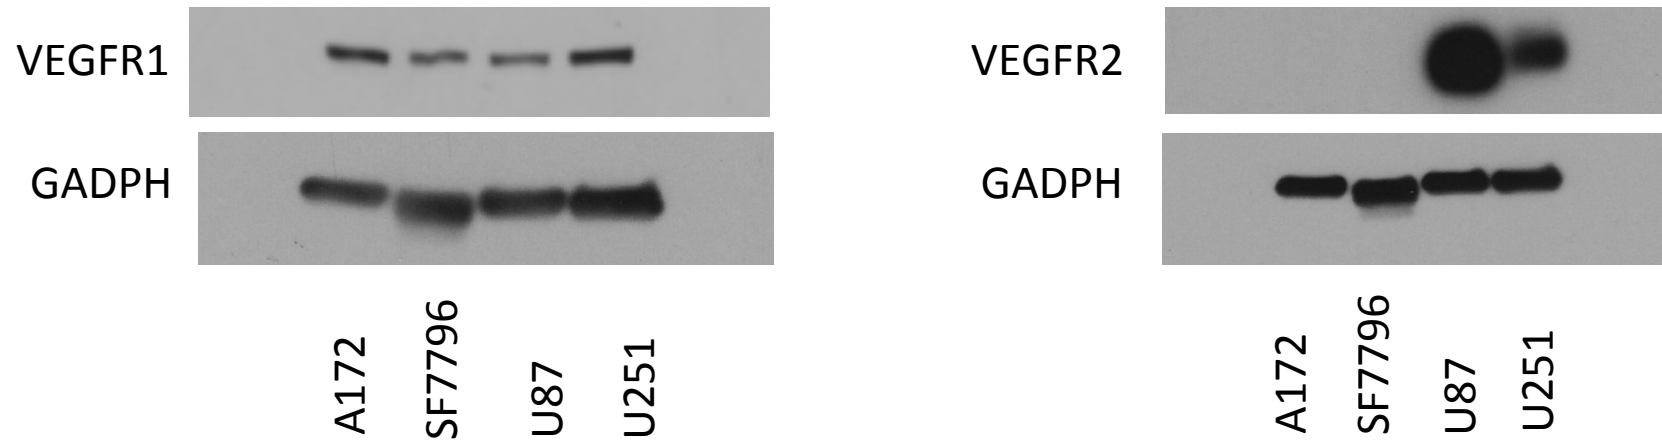

**Supplementary Figure S12: Levels of VEGFR1 and VEGFR2 in four different glioma cell lines.** All glioma cell lines expressed high amounts of VEGFR1, however only U87 and U251 cells expressed high levels of VEGFR2.

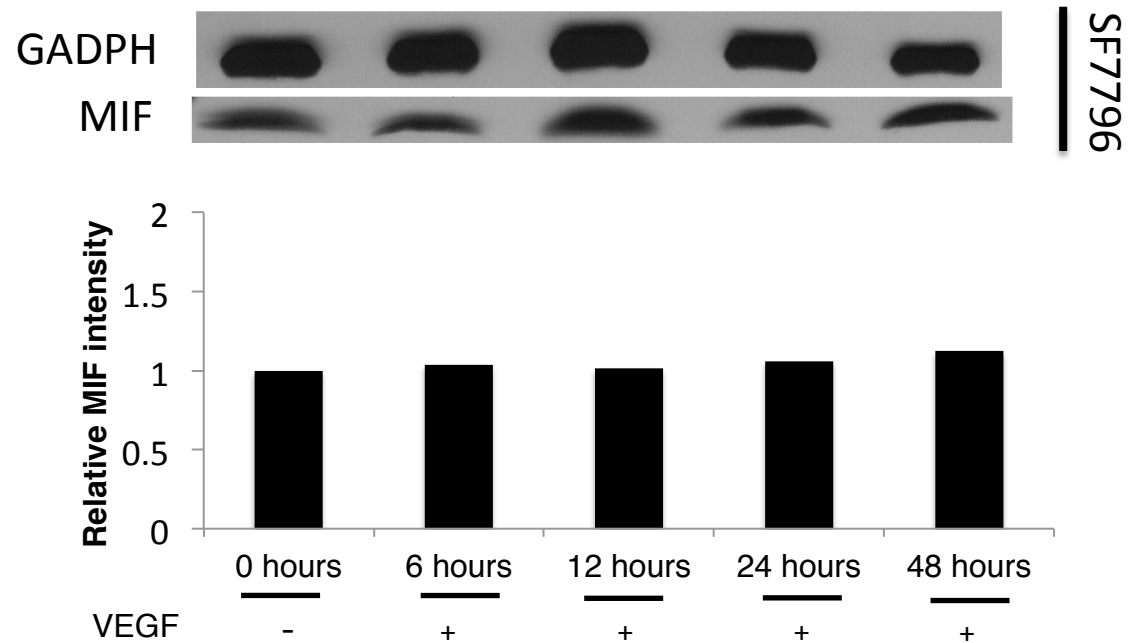

**Supplementary Figure S13: VEGF stimulation of VEGFR2 low-expressing glioma cell line SF7796.** No appreciable increase occurred in MIF expression when SF7796 cells were stimulated with 100 ng/mL rhVEGF.
